# Supplementary material for: circ_0039787 promotes cervical cancer cell tumorigenesis by regulation of the miR-877-5p-KRAS axis
Source: Aging (Albany NY). 2024 Feb 2;16(3):2736–52. doi: 10.18632/aging.205508 (PMC10911348; doi:10.18632/aging.205508)
Supplement: Supplementary Figures [file aging-16-205508-s001.pdf]

## SUPPLEMENTARY FIGURES

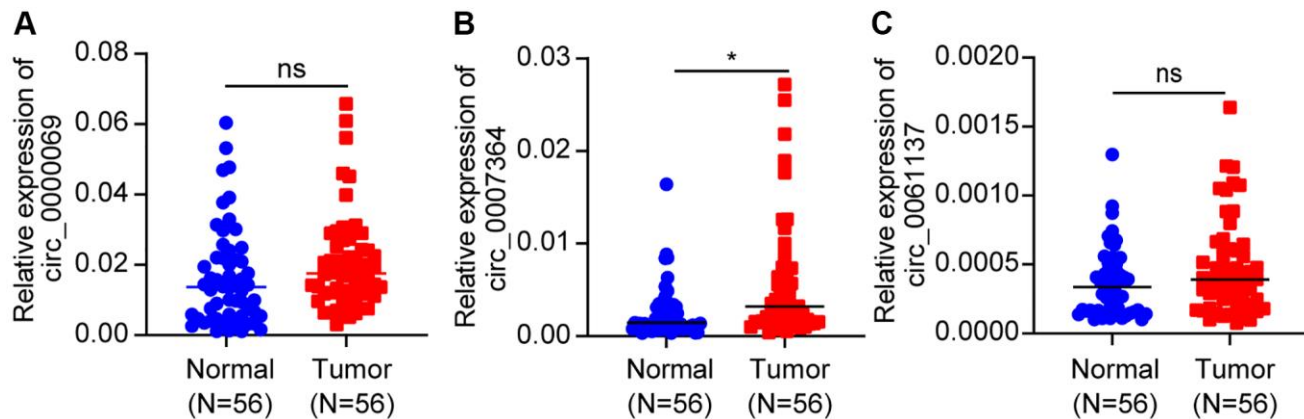

**Supplementary Figure 1. Identification of circ\_0039787 in CC.** (A) circ\_0000069 mRNA levels in CC and paracancerous tissues,  $N = 56$ . (B) circ\_0007364 mRNA levels in CC and paracancerous tissues,  $N = 56$ . (C) circ\_0061137 mRNA levels in CC and paracancerous tissues,  $N = 56$ .

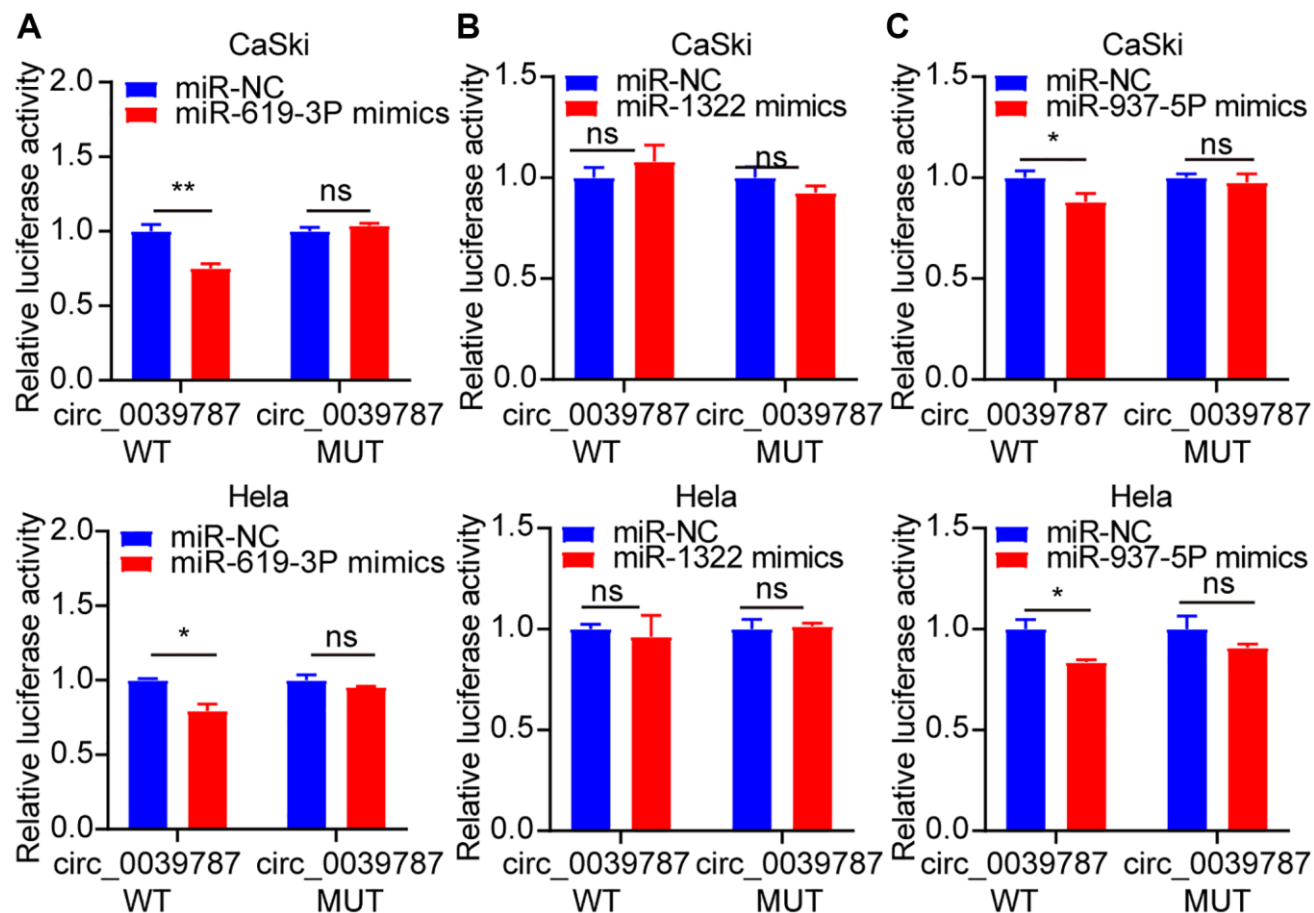

**Supplementary Figure 2. Illustrates the negative regulation of miR-877-5p in CC cells by circ\_0039787.** (A–C) Luciferase reporter assay conducted for circ\_0039787-WT and circ\_0039787-MUT.
